# Supplementary material for: Vibrationally induced metallisation of the energetic azide α-NaN3
Source: Royal Society of Chemistry journal article supplement (doi:10.1039/c8cp06161k), 2018-01-01
Supplement: c8cp06161k1.pdf [file c8cp06161k1.pdf]

**Electronic Supplementary Information:**

**Vibrationally Induced Metallization of Energetic Azide  $\alpha\text{-NaN}_3$**

Adam A.L. Michalchuk, Svemir Rudić, Colin R. Pulham and Carole A. Morrison

Contents

|                                                                                                                              |   |
|------------------------------------------------------------------------------------------------------------------------------|---|
| <b>S1 Vibrational frequencies for <math>\alpha\text{-NaN}_3</math></b> .....                                                 | 1 |
| <b>S2 Inelastic Neutron Scattering Spectra for <math>\alpha\text{-NaN}_3</math></b> .....                                    | 1 |
| <b>S3 Eigenvector ‘walking’ for <math>M_{16}</math> in <math>\alpha\text{-NaN}_3</math></b> .....                            | 2 |
| <b>S4 Eigenvectors associated with <math>\alpha\text{-NaN}_3</math></b> .....                                                | 3 |
| <b>S5 Band Gap Reduction for <math>M_{18}</math>, <math>M_{20}</math>, <math>M_{21}</math> and <math>M_{23}</math></b> ..... | 3 |
| <b>S6 References</b> .....                                                                                                   | 3 |

**S1 Vibrational frequencies for  $\alpha\text{-NaN}_3$**

The zone-centre vibrational modes were calculated for crystalline  $\alpha\text{-NaN}_3$  using both the PBE-D2 and PBE-TS schemes, with resulting frequencies shown in Table S1.1.

Table S1.1: Zone centre vibrational frequencies for  $\alpha\text{-NaN}_3$  (primitive cell) based on the PBE DFT functional. Values are shown corresponding to the Grimme D2 (PBE-D2) and Tkatchenko-Scheffler (PBE-TS) dispersion corrections. LO-TO splitting is not considered.

|       | <b>PBE-D2 /cm<sup>-1</sup></b> | <b>PBE-TS /cm<sup>-1</sup></b> |
|-------|--------------------------------|--------------------------------|
| $M_1$ | 150.974                        | 126.970                        |
| $M_2$ | 177.998                        | 174.320                        |
| $M_3$ | 202.210                        | 187.008                        |
| $M_4$ | 214.510                        | 189.240                        |
| $M_5$ | 220.220                        | 226.954                        |
| $M_6$ | 606.277                        | 611.254                        |
| $M_7$ | 609.716                        | 612.105                        |
| $M_8$ | 1250.429                       | 1252.237                       |
| $M_9$ | 1959.812                       | 1961.848                       |

**S2 Inelastic Neutron Scattering Spectra for  $\alpha\text{-NaN}_3$**

At low temperature, the intensity,  $I$ , of inelastic neutron scattering increases as<sup>1</sup>

$$I \propto (Q.u)^2$$

where  $Q$  is the momentum transfer and  $u$  is the total atomic displacement of the normal coordinate. On the TOSCA instrument, the back-scattering detectors follow a trajectory in  $S(Q,\omega)$  slightly higher in  $Q$  than the forward scattering detectors.<sup>2</sup> Hence the intensity of the back-scattering detectors should exhibit larger scattering intensities. This is most notable at low wavenumber. However, for  $\alpha\text{-NaN}_3$ , the low wavenumber scattering intensity is higher in the forward scattering detectors, Figure S1. This likely stems

from the dominant coherent scattering (directionally dependent) of  $\text{NaN}_3$ , and requires further investigation.

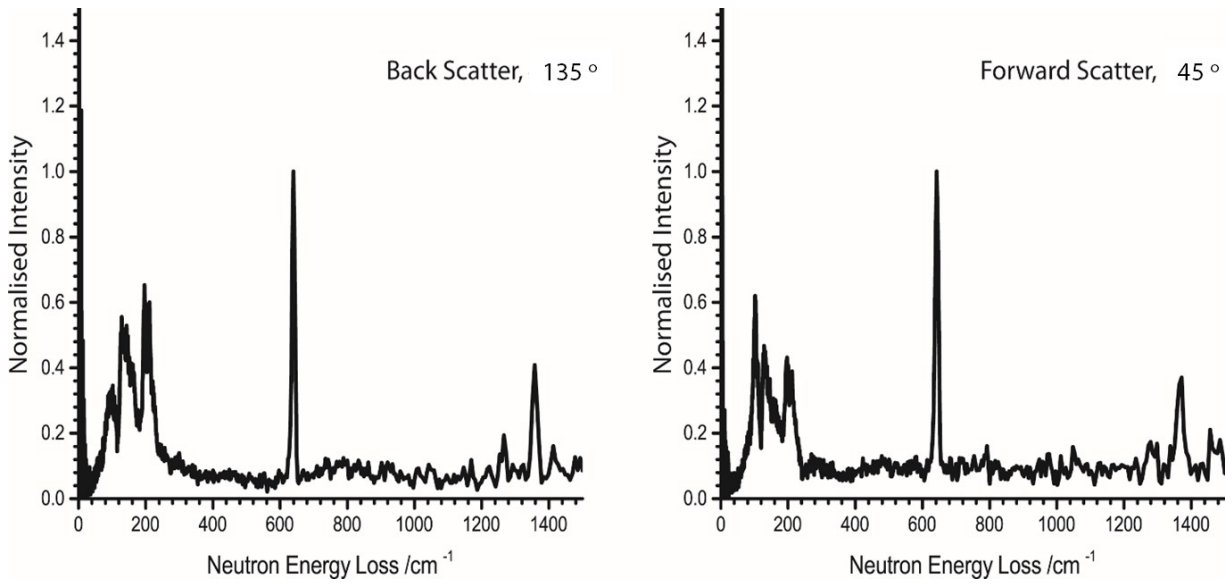

Figure S1: Inelastic neutron scattering spectra for  $\alpha\text{-NaN}_3$  at *ca* 20 K. Signal from the forward and back-scattering detectors are shown separately. Intensities have been normalised to the dominant peak at *ca*  $630\text{ cm}^{-1}$ .

### S3 Eigenvector ‘walking’ for $M_{16}$ in $\alpha\text{-NaN}_3$

The eigenvector associated with  $M_{16}$  exhibits considerable decrease in the band gap energy in  $\alpha\text{-NaN}_3$ . Further extension of this eigenvector results in near metallisation, Figure S2.

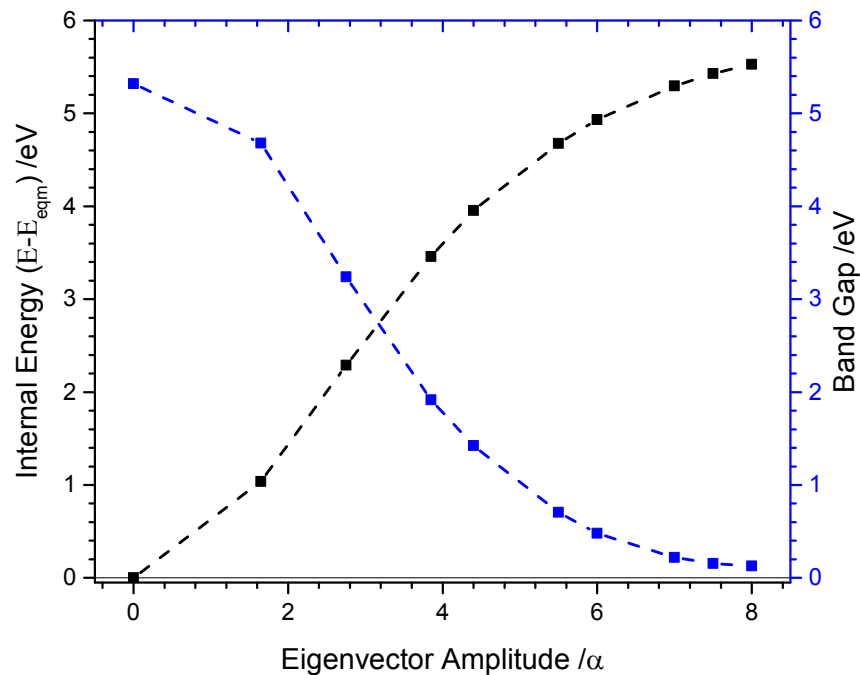

Figure S2: Band gap and internal energy along Mode 16, extended to  $\alpha = 8$ .

### S4 Eigenvectors associated with the external modes of $\alpha$ -NaN<sub>3</sub>

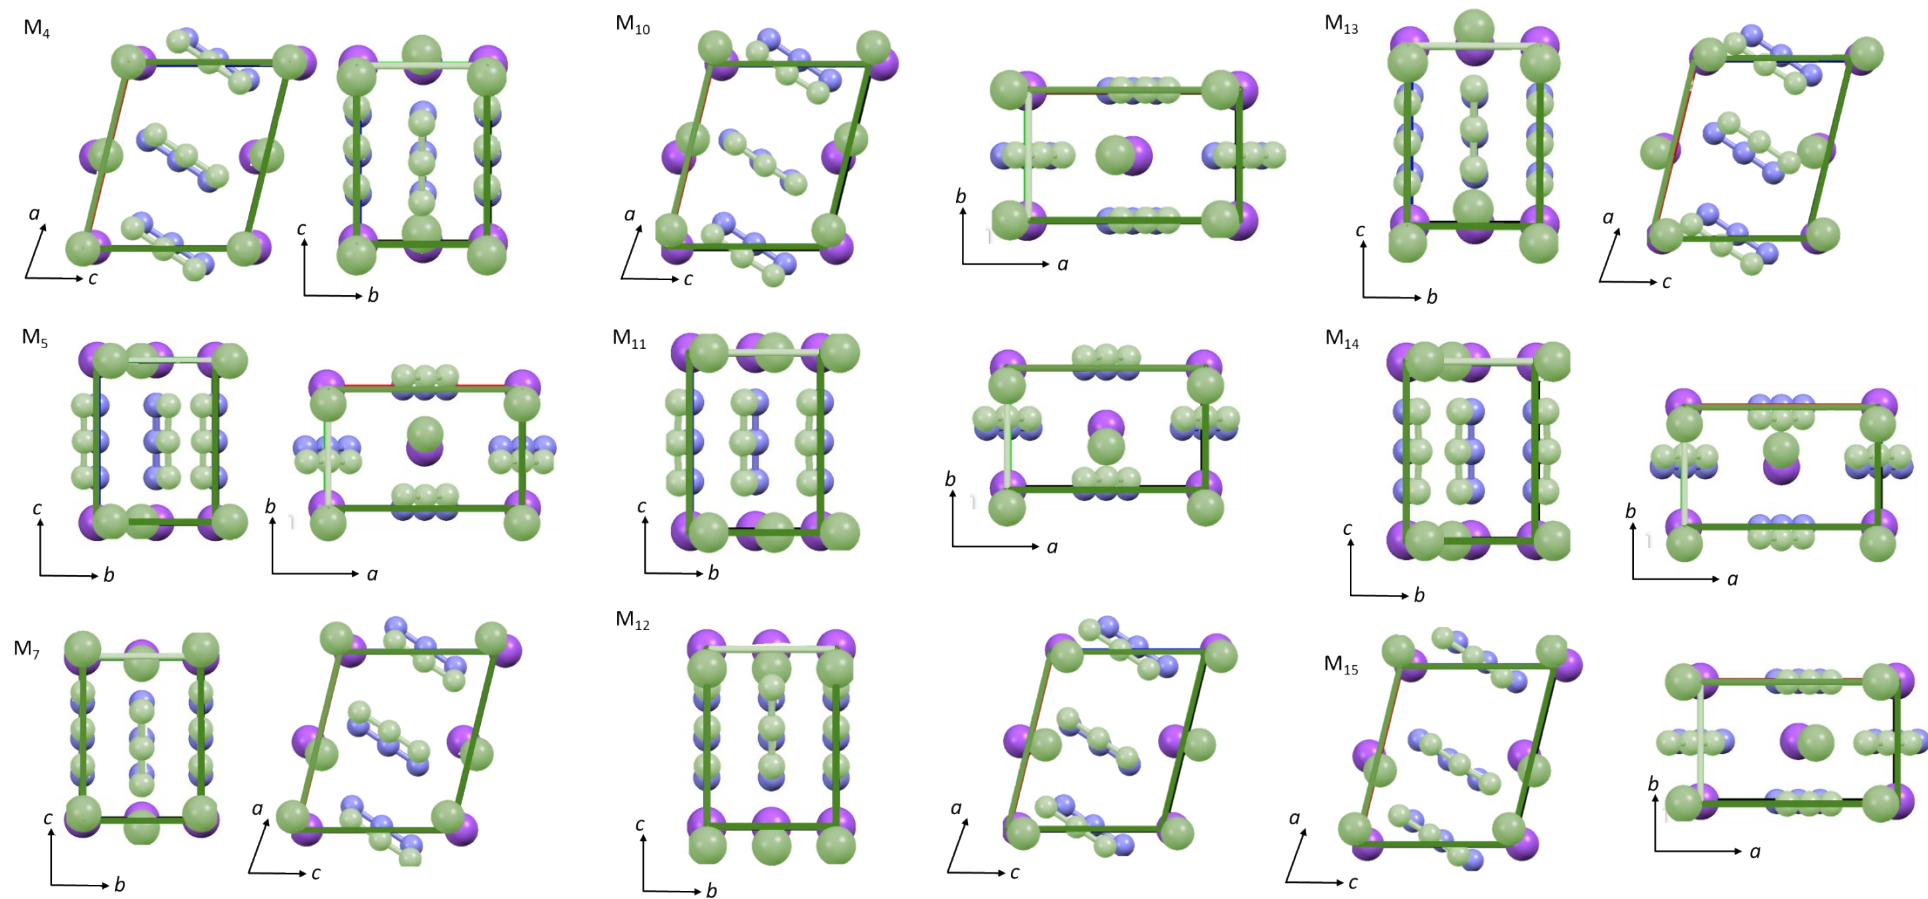

Figure S3: Eigenvectors of the external vibrational modes of  $\alpha$ -NaN<sub>3</sub>. Displacements are shown along the two crystallographic axes that best illustrate the distortion.

## S5 Band Gap Reduction for $M_{18}$ , $M_{20}$ , $M_{21}$ and $M_{23}$

The band gap was followed as a function of the eight internal modes of the conventional unit cell, Figure 6 and 8 in the main text, and Figure S4. Note that  $M_{21}$  is the out-of-phase symmetric stretching mode. As such, this mode could not be followed to metallisation due to compression of one of the azido anion molecules.

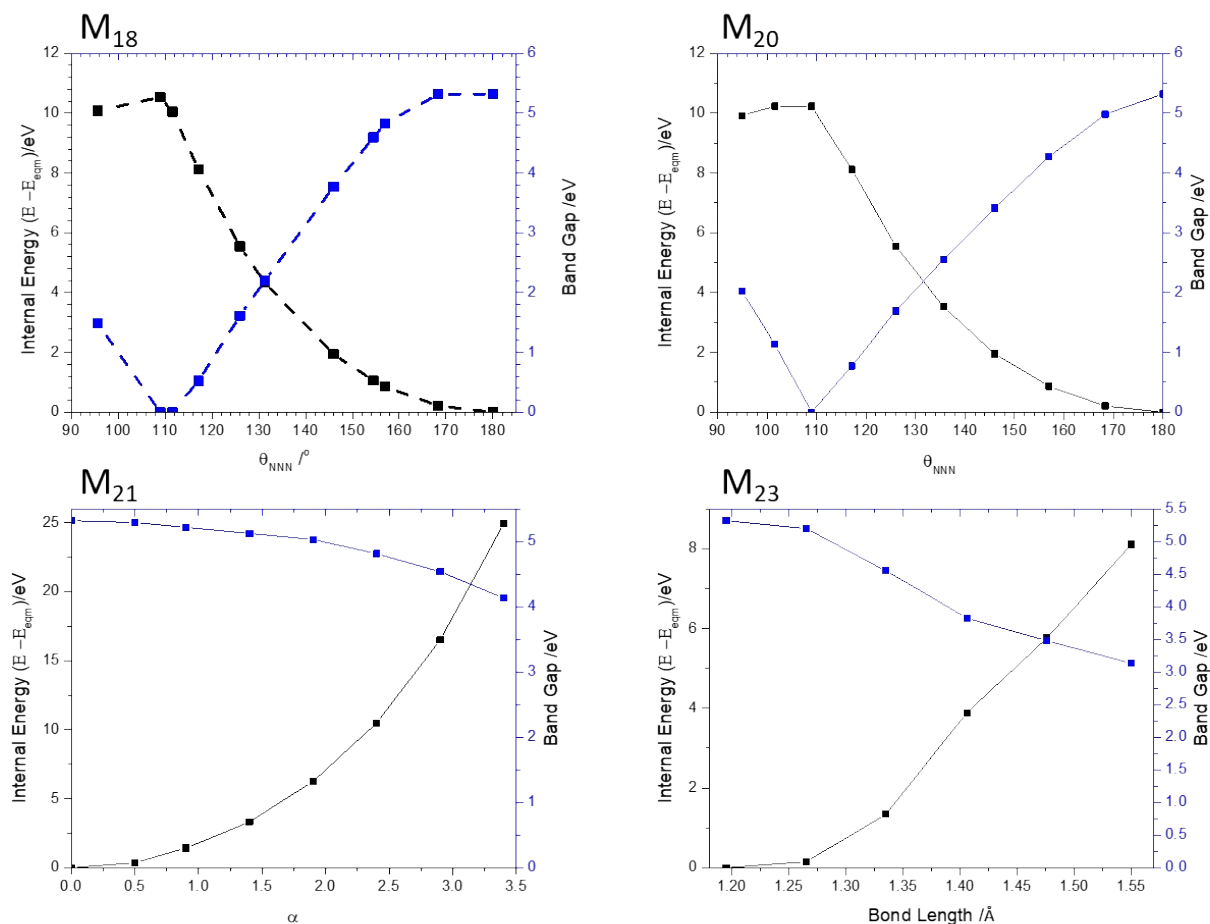

Figure S4: Band gap and internal energy as a function of the internal molecular modes of  $\alpha$ -NaN<sub>3</sub>.

## S6 References

- 1 P. C. Mitchell, S. F. Parker, A. J. Ramirez-Cuesta and J. Tomkinson, *Vibrational Spectroscopy with Neutrons*, World Scientific, 2005.
- 2 D. Colognesi, M. Celli, F. Cilloco, R. J. Newport, S. F. Parker, V. Rossi-Albertini, F. Sacchetti, J. Tomkinson and M. Zoppi, *Appl. Phys. A Mater. Sci. Process.*, 2002, **74**, 64–66.
